# Supplementary material for: Hexafluorophosphate salts with tropine-type cations in the extraction of alkaloids with the same nucleus from radix physochlainae
Source: Royal Society of Chemistry journal article supplement (doi:10.1039/c7ra12687e), 2018-01-01
Supplement: c7ra12687e1.pdf [file c7ra12687e1.pdf]

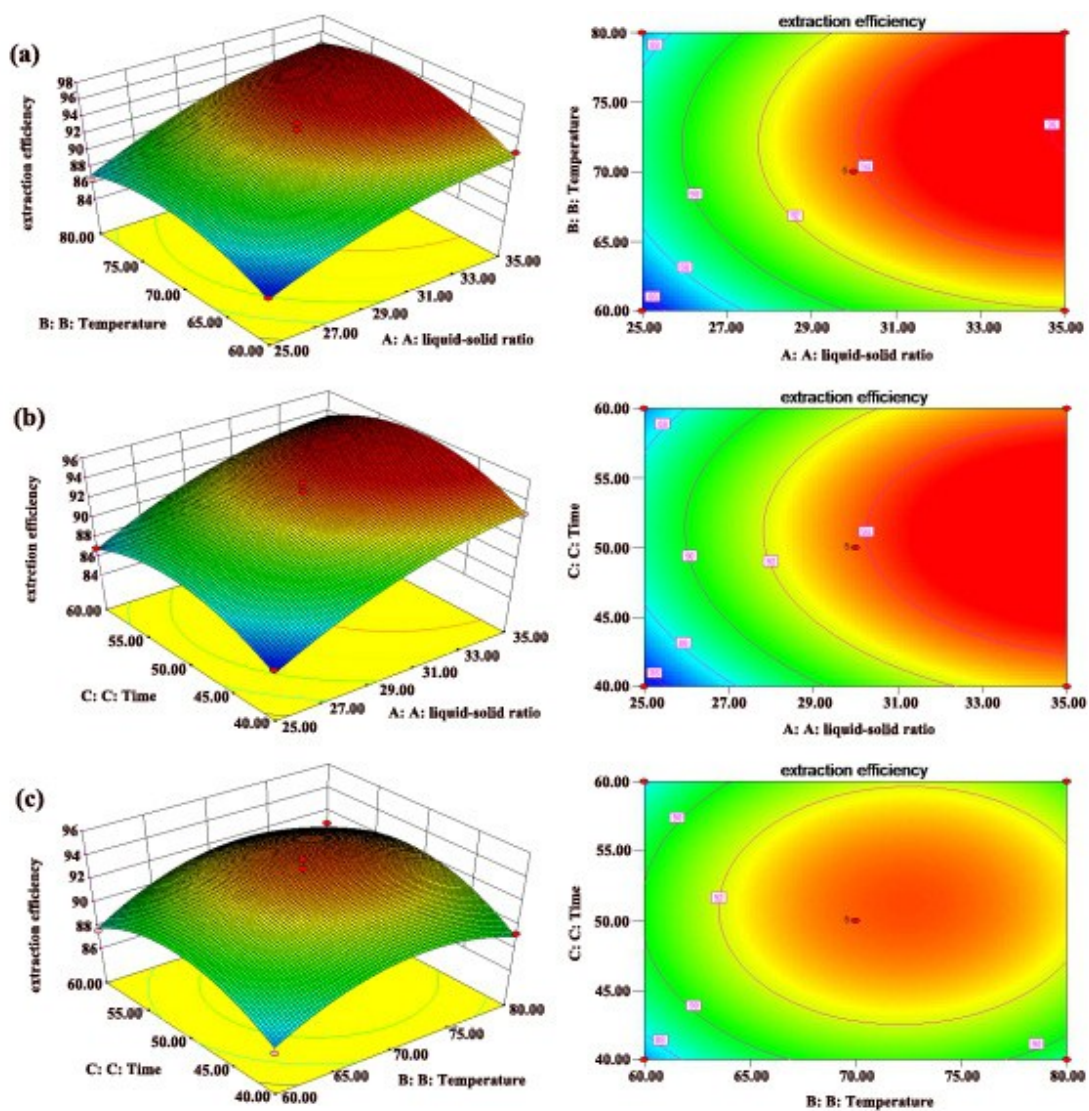

Supplementary Information 1(a) 3D-plots between related parameters for the extraction of tropane alkaloids

**Supplementary Information 1(b)** The analysis results of response surface method

| Source               | Sum of Squares | df | Mean Square | F Value | p-value Prob> F |
|----------------------|----------------|----|-------------|---------|-----------------|
| Model                | 188.54         | 9  | 20.95       | 48.29   | < 0.0001        |
| A:liquid-solid ratio | 100.47         | 1  | 100.47      | 231.58  | < 0.0001        |
| B:Temperature        | 10.82          | 1  | 10.82       | 24.94   | 0.0016          |
| C:Time               | 2.48           | 1  | 2.48        | 5.73    | 0.0479          |
| AB                   | 0.30           | 1  | 0.30        | 0.69    | 0.4342          |
| AC                   | 0.15           | 1  | 0.15        | 0.34    | 0.5755          |
| BC                   | 0.083          | 1  | 0.083       | 0.19    | 0.6741          |
| A <sup>2</sup>       | 9.46           | 1  | 9.46        | 21.80   | 0.0023          |
| B <sup>2</sup>       | 27.16          | 1  | 27.16       | 62.61   | < 0.0001        |
| C <sup>2</sup>       | 30.33          | 1  | 30.33       | 69.92   | < 0.0001        |
| Residual             | 3.04           | 7  | 0.43        |         |                 |
| Lack of Fit          | 1.74           | 3  | 0.58        | 1.78    | 0.2893          |
| Pure Error           | 1.30           | 4  | 0.32        |         |                 |
| Cor Total            | 191.58         | 16 |             |         |                 |

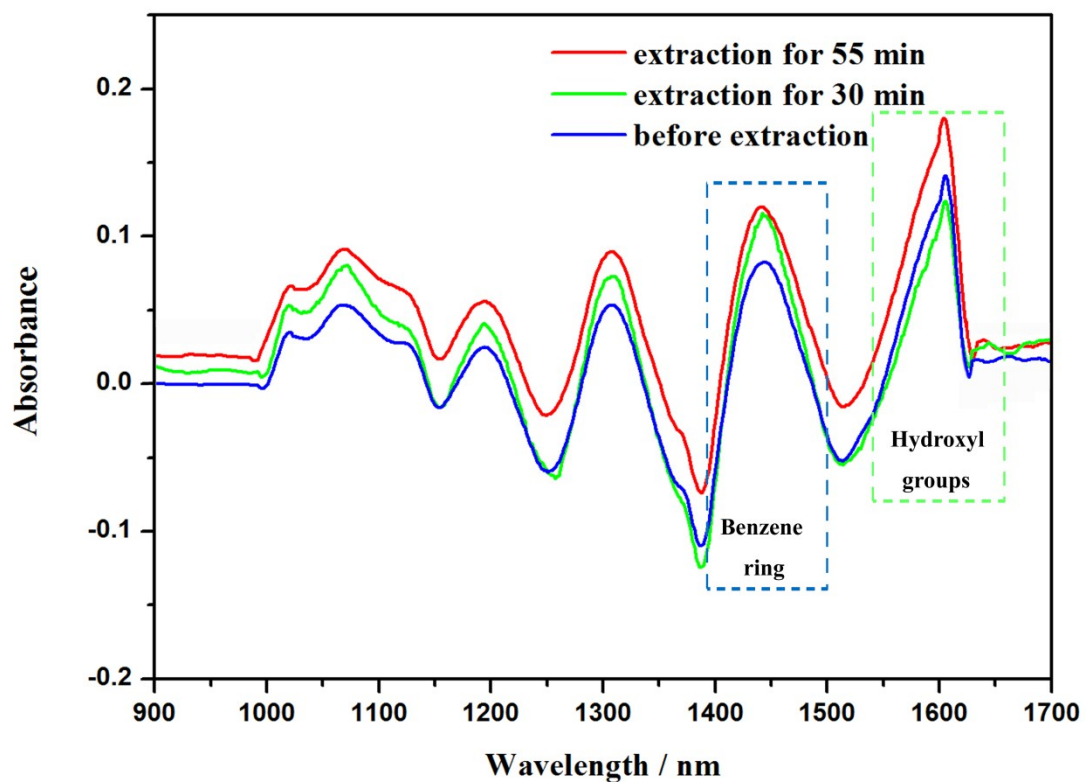

**Supplementary Information 2** The NIR spectra of alkaloids extraction from *Radix Physochlainae*
